# Supplementary material for: Volcanism straddling the Miocene–Pliocene boundary on Patmos and Chiliomodi islands (southeastern Aegean Sea): insights from new 40 Ar ∕ 39 Ar ages
Source: Copernicus journal article supplement (doi:10.5194/gchron-5-391-2023), 2023-10-11
Supplement: Supplementary file 1 [file gchron-5-391-2023-supplement.zip]

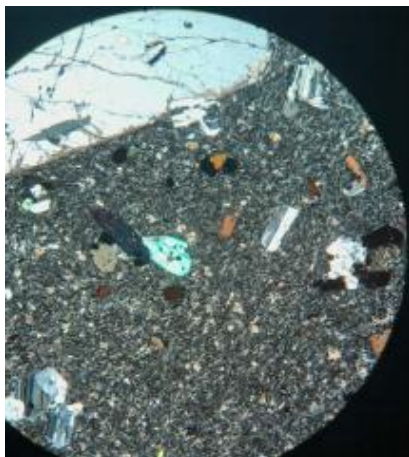

Trachyte P7: sanidine, quartz, biotite, clinopyroxene, olivine

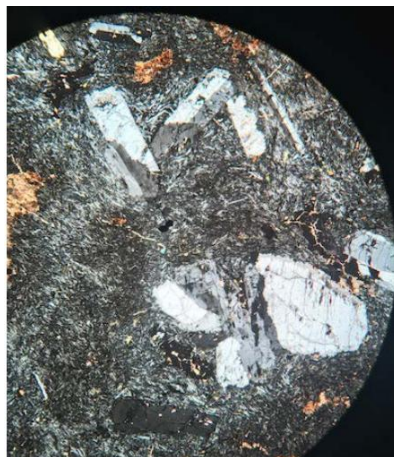

Phonolite P10A: sanidine, sodalite, chlorite, amphibole, orthopyroxene, biotite

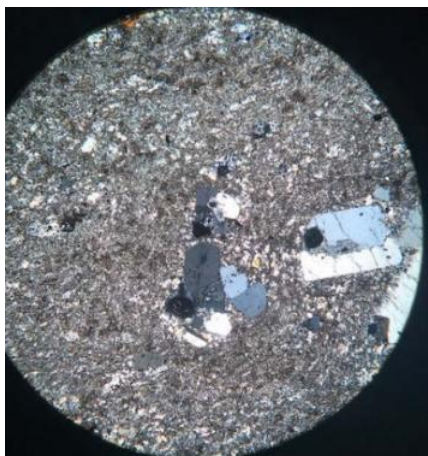

Rhyolite P9: sanidine, quartz, biotite

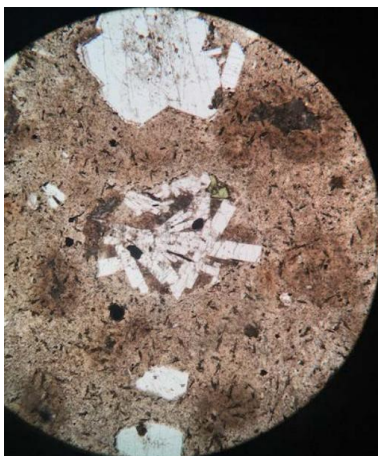

Phonolite P10B: sodalite, sanidine, chlorite, biotite

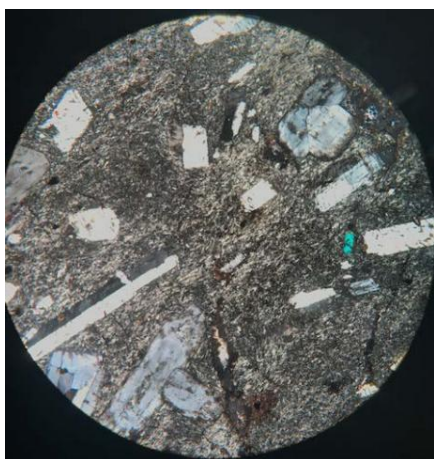

Phonolite P12: sanidine, chlorite, sodalite, clinopyroxene, amphibole, nepheline
