# Supplementary material for: Volcanism straddling the Miocene–Pliocene boundary on Patmos and Chiliomodi islands (southeastern Aegean Sea): insights from new 40 Ar ∕ 39 Ar ages
Source: Copernicus journal article supplement (doi:10.5194/gchron-5-391-2023), 2023-10-11
Supplement: Supplementary file 2 [file gchron-5-391-2023-supplement.zip]

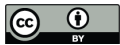

*Supplement of*

**Volcanism straddling the Miocene–Pliocene boundary on Patmos and Chios islands (southeastern Aegean Sea): insights from new  $^{40}\text{Ar} / ^{39}\text{Ar}$  ages**

**Katharina M. Boehm et al.**

*Correspondence to:* Klaudia F. Kuiper (k.f.kuiper@vu.nl)

- gchron-5-391-2023-supplement-title-page.pdf
- FigS1.pdf
- TablesS1\_S2\_S3.xlsx

The copyright of individual parts of the supplement might differ from the article licence.
